# Supplementary material
Source: publisher figshare collection journal article supplement (https://gsajournals.figshare.com/ndownloader/files/11212226)
Supplement: Supplementary file 1 [file 11212226]

## Sheet: Sheet1
Table S1. A detailed list of the number of copies and percent of transposons and repeated elements in the Gambusia affinis genome.
Classification	Number of copies	Percentage of assembly
DNA Transposons
Academ	600	0.02722
CMC-Chapaev-3	310	0.01579
CMC-EnSpm	825	0.01427
Kolobok-T2	607	0.02563
Merlin	1144	0.0303
MULE-MuDR	898	0.0329
PIF-Harbinger	9897	0.45702
PIF-ISL2EU	3559	0.16284
PiggyBac	7996	0.3492
TcMariner	183842	4.78829
hAT	62452	2.03977
Helitron	4743	0.19566
MITE	21578	0.56671
Unclassified DNA	19880	0.65578
Total DNA Transposons	318331	9.36138
LTR Retrotransposons
Gypsy	1471	0.07761
Ngaro	10160	0.26536
Pao	287	0.00657
ERV1	454	0.01758
Unclassified LTR	230	0.01161
Total LTR Retrotransposons	12602	0.37873
LINE Retrotransposons
Dong-R4	195	0.00787
I	341	0.00961
LINE1	670	0.01869
LINE2	26519	0.72455
Penelope	770	0.01738
Proto2	136	0.00544
RTE	7158	0.21687
Rex-Babar	13841	0.38951
Unclassified LINE	418	0.01145
Total LINE Retrotransposons	50048	1.40137
SINE Retrotransposons
MIR	2100	0.04935
tRNA	14289	0.3677
Unclassified SINE	220	0.01025
Total SINE Retrotransposons	16609	0.4273
Unknown	198564	6.23
Total transposable elementsa	596154	17.7988
Low complexity regionsb	33073	0.255
Satellitesc	4914	0.229
Microsatellites	219965	1.431
TOTAL Repeats	854106	19.7138
a Includes DNA transposons, LTR, LINE, SINE retrotransposons and unknown.
b Regions composed of a single or two nucleotides, e.g.: A-rich, GA-rich, C-rich
c Duplications of complex sequences 100-200 bp long
